# Supplementary material for: Universality in interior periodic assembly of banded d-(−)-poly(3-hydroxybutyrate) justified with the iridescence test
Source: Royal Society of Chemistry journal article supplement (doi:10.1039/d3ce01241g), 2024-01-01
Supplement: d3ce01241g1.pdf [file d3ce01241g1.pdf]

## Supporting information

### Universality in Interior Periodic Assembly of Banded D-(-)-Poly(3-hydroxybutyrate) Justified with Iridescence Tests

Tzu-Ching Chuang<sup>a</sup>, Selvaraj Nagarajan<sup>a</sup>, Chean-Cheng Su<sup>b</sup>, Li-Ting Lee<sup>c\*</sup>, Eamor M. Woo<sup>a,\*</sup>

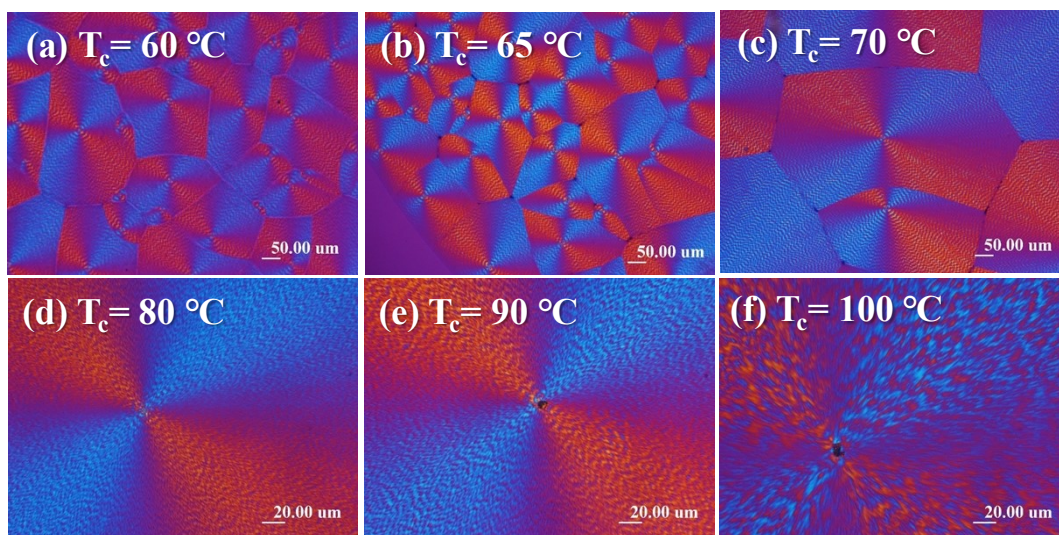

Figure S1. POM graphs of neat PHB spherulites (not blended with any diluents) crystallized at various  $T_c$ 's = (a)  $60\text{ }^\circ\text{C}$ , (b)  $65\text{ }^\circ\text{C}$ , (c)  $70\text{ }^\circ\text{C}$ , (d)  $80\text{ }^\circ\text{C}$ , (e)  $90\text{ }^\circ\text{C}$ , (f)  $100\text{ }^\circ\text{C}$ , all showing irregular ring patterns.

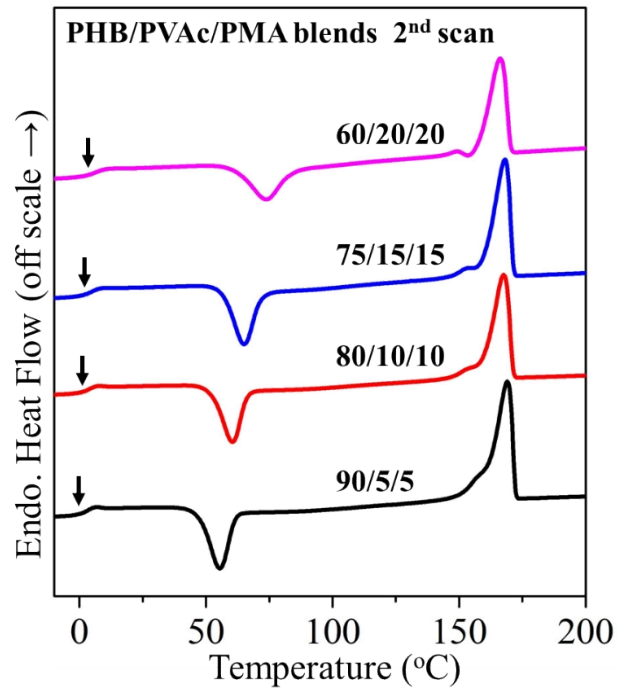

**Figure S2.** DSC traces of PHB/PVAc/PMA blends of different compositions (scanning rate = 20 °C/min).

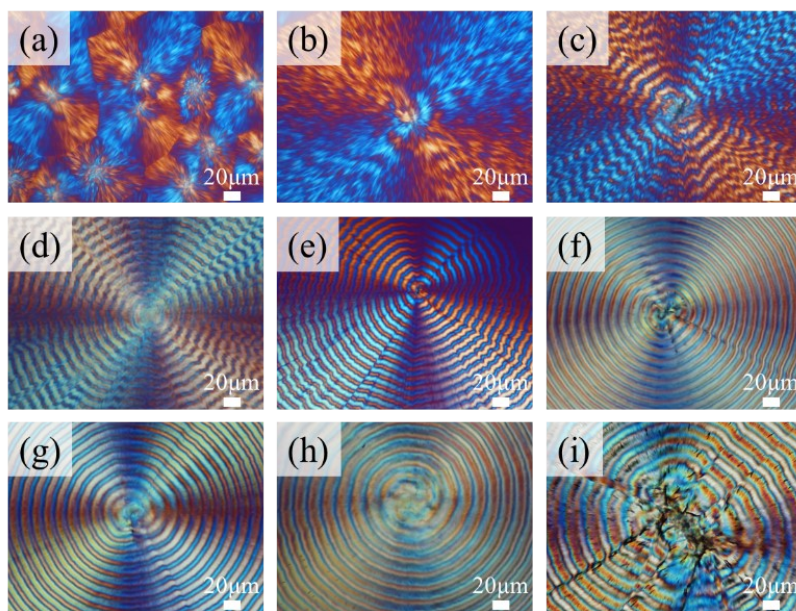

**Figure S3.** POM graphs of PHB/PVAc/PMA (80/10/10) blend crystallized at  $T_c =$  (a) 60 °C, (b) 70 °C, (c) 80 °C, (d) 90 °C, (e) 95 °C, (f) 100 °C, (g) 105 °C, (h) 110 °C, and (i) 120 °C [scale bar = 20  $\mu\text{m}$ ].

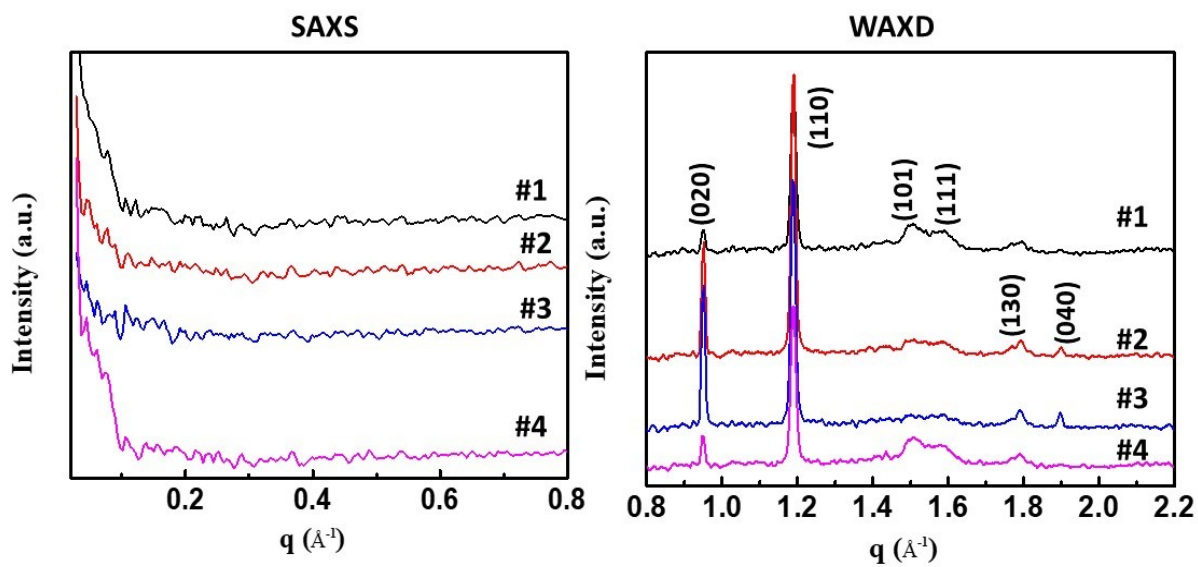

**Figure S4:** 1D X-ray diffraction plot on the PHB/PVAc/PMA banded spherulite.

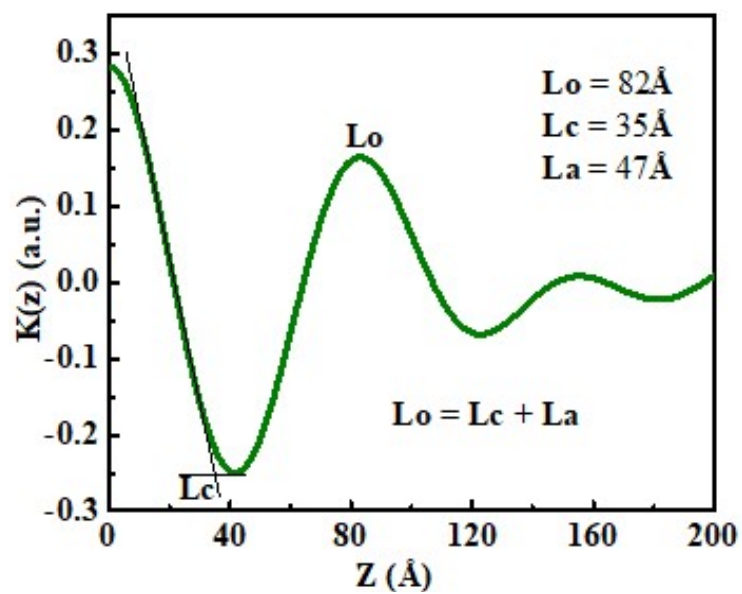

**Figure S5:** 1D correlation function of SAXS signal at spot #1 on the PHB/PVAc /PMA banded spherulite.

**Table S1.** Glass transition temperature ( $T_g$ ) from DSC results of PHB/PVAc/PMA blends of different compositions.

| <b>Ratio</b>                 | <b>90/5/5</b> | <b>80/10/10</b> | <b>70/15/15</b> | <b>60/20/20</b> |
|------------------------------|---------------|-----------------|-----------------|-----------------|
| <b><math>T_g</math> (°C)</b> | 1.69          | 2.4             | 3.71            | 5.23            |
